# Supplementary material
Source: HighWire-hosted journal article supplement (https://jme.bmj.com/highwire/filestream/144583/field_highwire_adjunct_files/0/BristolQP.pdf)
Supplement: BristolQP.pdf [file BristolQP.pdf]

# ONE DAY CONFERENCE

Monday 18 November 2002

The Queen Elizabeth II Conference Centre,  
Broad Sanctuary, Westminster,  
London, SW1P 3EE

## *beyond* Bristol

**BMJ**  
Publishing Group

[www.bmj.com](http://www.bmj.com)

**Quality and Safety  
in Health Care**  
[www.qualityhealthcare.com](http://www.qualityhealthcare.com)

Journal of  
**Medical Ethics**  
[www.jmedethics.com](http://www.jmedethics.com)

**BMA**  
[www.bma.org.uk](http://www.bma.org.uk)

*improving health care*

For more information and a full conference brochure/registration form please contact:

**BMA/BMJ Conference Unit,  
BMA House, Tavistock Square,  
London, WC1H 9JP, UK**

**Tel: +44 (0) 20 7383 6605;**

**Fax: +44 (0) 20 7383 6663;**

**Email: [confunit@bma.org.uk](mailto:confunit@bma.org.uk) or visit**

**[www.bma.org.uk/conferences](http://www.bma.org.uk/conferences)**

*PGEA & CME  
approval applied for*
